# Supplementary material for: In Vitro and in Silico Evidence of Phosphatase Diversity in the Biomineralizing Bacterium Ramlibacter tataouinensis
Source: PubMed Central journal article supplement (PMC5768637; doi:10.3389/fmicb.2017.02592), 2018-01-11
Supplement: Image1.pdf [file Image1.pdf]

a

```
[AVE_SECSTR] CCCCSScCTTCEEECCSSCEEEECcSBcstttTccccSCEEEEEEESSTTsSSEEEEEEEECtttTTEEEEEESCCTTCEEEEEEETTEECCCEEECCCC TTCCCSCEEEEECCCCGGGC
2yeqA 57(1):APNFSSYFFTLVASGDPLSDSVVLWTRLAPDPLN-GGGMPKQAVPVKWEVAKDEHF RKIVRKGTEMAKPSLAHSVHVEADGLEPNKVYYRfKtGHELSPVGKTKTLPA PGANVPQMTFAFAScQQYEHG:186 (130)
Rta      32:QRRWGFDFSLGVASGSPADSVVLWTRL-LGPGWWDsIGE-APVpvrweVAHDQGF SRIARRGETLALAQI GHSVHAEVAGLEpDRWYfYRftAGHAVSPtGRTRTLPA ADALPARLRLAYAScQRWEHG:160
          ** *  ** *  ** *  ** *  ** *  ** *  ** *  ** *  ** *  ** *  ** *  ** *  ** *  ** *  ** *  ** *  ** *  ** *  ** *  ** *  ** *  ** *  ** *  ** *  ** *  ** *  ** *  ** *
```

```
[AVE_SECSTR] CCHHHHHhhSCSSEEEECSCSSCCCsSssttCsSCSSSSSCSHHHHHHHHHHTCHHHHHHHHHSEEEECcSTTSTTCBTTBCSTTCsSSSScHHHHHHHHHHHHHHHHHSCCGGGsCccs
2yeqA      YYTAYKHMAKEKLDLVFHLGDIYIYEYGNPNEYVSKTGnvrTHNSAEII TLQDyRNRHAQYrSDANLKAHAAFpWVVtWDDHEVENNYANKIPEKQ-----SVEAFVLRRAAYQAYYEhMPLRISLpn---:310 (254)
Rta      YYGAYRHMRRELQLDLVMFLGDYIYEYpN-AT-A--AVRDFPTLGwVHTLQeYRERHALHRGDVHLQAMHAACPwLVSwDDHEVQNDYAAgQAGDGRPLGLNASDFAAARRAAAYQAYYEhMPLRASALGGAL:288
          ** *  ** *  ** *  ** *  ** *  ** *  ** *  ** *  ** *  ** *  ** *  ** *  ** *  ** *  ** *  ** *  ** *  ** *  ** *  ** *  ** *  ** *  ** *  ** *  ** *  ** *  ** *  ** *
```

```
[AVE_SECSTR] ssscctssCCCEEEETTTTEEEECSSSSCCcCcttsSSscscssssscCHHHHTTCCSSCHHHHHHHHHHHHCCSSEEEECSSCCSccSccSscSscSsccttTSGGGHHHHHHHHHHHHHTCCCEE
2yeqA      ----GpDMQLYRHfTYGNLASfNVLDRQYRDDQANNDGN-----KPPsDESrNPnRtLLgKEQEwLfnNLGSsTAHWnVLAQQiFFakwnfGtSAsPiYsMDSWDGYPAQRERVInFIKsKlNlnnvV:431 (375)
Rta      AGVAGAADVRLYGRWRfGRLADLLLDTRQYRDRQVCgPDFKpSGQVhPSACPAWEDPGRSLlgAAQEwLDTAFaQAGSGWTVvGQQTlFGRRDNHPGAGeQFwNDGWdGYGAARRRVtGSLQRhQVvNpV:420
          *  *  *  *  *  *  *  *  *  *  *  *  *  *  *  *  *  *  *  *  *  *  *  *  *  *  *  *  *  *  *  *  *  *  *  *  *  *  *  *  *  *  *  *  *  *  *  *  *  *  *
```

```
[AVE_SECSTR] EEECSSSSEEEEEESSTTcssSCEEEEEEECCSSTTCSCcScCsthhhcsshCTTEEEECscsEEEEEEECsseEEEEEEECSSSSCCCCCEEEEEECSSTTCeEEceeccttccsbcscthh
2yeqA      VLTGDvHfASWASnLHVdFEKtSsKIFGAefvGtSITSGNgADkRADTDQILKENPHIQFFN-DYRGYVRCTVTPhQWKADYRVMPfVTEPGAAsIstrAsfVYQKDQTLRKvSSTTiQGgVKQsDEVEEBh:562 (506)
Rta      FLGGDvHENWVGHVKADYARQGASLgVEfCgTSITSRAGgAEQvA-Q--RLAENPhyVfADGwRRGYSVCEFTpQRLtTTLRVLDdatREdARIEtQARfTVQAGRPRLERa-----:530
          *  *  *  *  *  *  *  *  *  *  *  *  *  *  *  *  *  *  *  *  *  *  *  *  *  *  *  *  *  *  *  *  *  *  *  *  *  *  *  *  *  *  *  *  *  *  *  *  *  *  *
```

```
[AVE_SECSTR] hhhhhhhhhhhhtc
2yeqA      FFSHnkAHEKQMIKKR:(522)
Rta      -----
```

b

[AVE\_SECSTR] ccccccccccCscCSCCCCCCscscscscscscscsttcCbCtTteeeeeTTcbssCsttcccccttscchhhhhhbCCSSEEEEEEEecscscscscscscscsEEeEEECCHHHHSSsc  
4alfA 55(8):-----SRLLGFD SIPAATTD-----T--ISLPKGYKSSVLLSWGQP--LHKNGPAFDPSNGTAAQEVQFGDNDNGMSLFEFP-----GKGNRALMANNYTYNYRILYPHG:148(101)  
Rta-1 52:-----STPAARLRPGFEPVPIGAGD-----R--LIVPKGYVASALAPWGEVPLPGNLVVRPDAGNTADEQAAQMGMHHDGLHYFPLD-----GSRRLVLMNHBYVDDGLLHADG:151  
Rta-2 51:-----GTGPLLGRFSVAVSTED-----R--VTVPQGYVAQALAAWGEVPLGRLPLPFRPDASNTAAEQEALGMHHDGMHF FALE-----GGRGGLLAMNHBYTDDGLLHPDG:147  
Sme 77:-----EGEASPFDKEIEAGVDE-----T--HHAEGYDADILLRWGDK--VFADSPPEFDP-LKQTADAQSRQFGYNNNDYVGFIPLE-----GNPDHGLLVVNHBYTNAEIMFPNF:172  
Rta-3 68:ADVAAADVQSKALTLNFQPVPKSKAD-----A--VLVPRGYTATPIYATGDP--LAATVPEYLNLDGTD--DFEHRAGDQHDGMEYFGLNATGTARDPNGSKRGLLVVNHBYALVDQFLHNG:178  
Rta-4 32:-----APAFGPGFGLPTPLPLNTADLAVPGVDFDRRPLISLPPGFYRWAI SCTGQM--MSD-----GTLVPGDHDGMACYRGP-----SGTTLVVRNHBYLNNREIKFGNA:126  
. . . \* . . . . . : : \* . . . . . \* . . . . . : : \* . . . . . \* . . . . . : : \* . . . . . \* . . . . .

[AVE\_SECSTR] tccssscscscscscscscscscscCshHHHHHHHHHSEEEeeEEeettteeeettcttceeeettseeeesttttcgggccscscscscscceeeCCCSEEEEEECTTSCEEEEECSggggCbcscscsc  
4alfA -----G-----MP-----QSAEDVRKALACEGVSIVVQQRKN--GQWQFVQGSRYNRRIRHGNPLRISGPAAGHELMKTSADKHGKVKLGTFOCANGKTPWGTLYLTCEENFTDCFGSSNA--QQ:254(207)  
Rta-1 -----L-----KT-----WLEKVRKSAQAAGHIAVIEVQAAGGEWRMVRPSRFARRITANTPFNLGGPAAGHPLMRTAADPQGRVLTGFNCAAGITPWTYLSGEEFNFRNYFAAGS----:255  
Rta-2 -----F-----RT-----WNAEKVRKSAQAAGHVSIEVRQPPDGGWQVVRPSRWARRITARTPMAFGGPAAGHALLRTAADPAGLRPLGTLNCCSGRTPWGTLYLTCEENFAFYFRGPD----:251  
Sme --ARVEKVTED----GKEEDKVVLGEYTKELVDIEMAAGGTVIEIRKVD--GKWQVLDGKYNRRITATTEMQLSGPAAGHERVKTSPDPTGRKVFGTINNCAGGVTAWGTYMMAEENFNNGYFGGELAEDH:296  
Rta-3 -----VTAATATAG-----RPVAEVDKEIAAHGVSVAEVQRRG--QSFAYDRGSRYNRRVPLPFPQIHPARGDGLMVRTYSPDGTTCRGTINNCAGGVTAWGTYMMAEENFNNGYFGGELAEDH:290  
Rta-4 R-----G-----VD-----VDPGFKYDTYANGGTS TLVLGED--GGLL--RHYA--S-L-----GTTNNCCAGGPTPWGSLWLSCEETTAVPNA-----:192  
. . . \* . . . . . : : \* . . . . . \* . . . . . : : \* . . . . . \* . . . . . : : \* . . . . . \* . . . . .

[AVE\_SECSTR] cccscscscscscscscscscscCshHHHHHHHHHSEEEeeEEeettteeeettcttceeeettseeeesttttcgggccscscscscscceeeCCCSEEEEEECTTSCEEEEECSggggCbcscscsc  
4alfA Q-----FDPAQKRYGVSAAS--REINWHPF--D--PRFDMAK-----NPNELNRFGWVVEIDPFPDQ--STPVKRTALGRFKHENAALAEETDDGR--AVVYMGDDERGFYIKFVSRDKINHNA----:359(312)  
Rta-1 -----LDAHQRRLGLTAT--AFFRWAHEH--D--PRFDVAVG-----NPNEPNRFGWVVEIDPFPDPA--STPVKRTALGRAAHEGAVVAVTRDGR--AVVYSGEDARNEYIYKFSRDRIRPAGN----:359  
Rta-2 R-----PGGHEARWIGPTG--GWRWHEH--D--ERFDARR-----HPNEPNRFGWVVEIDPFPDPA--STPVKRTALGRAAHEGATVAVTRDGR--AVVYSGEDARNEYIYKFSRDRIRPAGN----:356  
Sme P-----EFQMKRLGTP--GG--QYEWKSF--Y--DRFDVSK-----EPNEPNRFGWVVEIDPFPDPA--STPVKRTALGRAAHEGATVAVTRDGR--AVVYSGEDARNEYIYKFSRDRIRPAGN----:399  
Rta-3 AARGGPMASVSLRRSGRNAGSASRHRWETAGTDDKYARWNI SQVAGAPAEYRNELNITYGYIVEIDPFDKN--VAIRKRTALGRFAHESAAGFLRAPGQPLAVYMGDDSQGEYMYKFSKMPWNPADEPA:421  
Rta-4 -----G-----LT-----TYQKRHGYYVFEFALASGPTQAIPITGMGRFSHEAAAVDPA--T--GIVYLTEDTSDSLFYRYVYQYR-----:259  
: : . . . : : . . . : : \* . . . . . \* . . . . . : : \* . . . . . \* . . . . . : : \* . . . . . \* . . . . .

[AVE\_SECSTR] ttccscscscscscscscscscscCshHHHHHHHHHHHHTCCeeCEEEEEecttttccCEEEEECCbttttcscscscscscscscscscscCshHHHHHHHHHHHHTCCeeCEEEEEecttttccCEEEEECCbttttcscscscscscscscscscsc  
4alfA -----KANRIDLHGTLYVARFDAGD-----GNPDHPKGGQWIELTHGKNGIDAS--SG--FADQAEVLIHARLAASVVGATRMDRPEWIVVSPKDG--QVYCTLTNNAKRGE--D--GQVPGGPNP:467(420)  
Rta-1 ---GLTAAQANRELLDHTLYVARFDAD-----GVGQWLPLVHGQGPLTAA--NG--FADQGEIVIKSRQASDLLGATKMDRPEWLAIDPVN--GTVYCTLTNNAKRGE--D--GQVPGGPNP:465  
Rta-2 -----RGNAGLLDHTLYAARFDAGD-----GSRWLPLVHGQGPLTAA--NG--FADQGEIVIKSRQASDLLGATKMDRPEWLAIDPVN--GTVYCTLTNNAKRGE--D--GQVPGGPNP:465  
Sme -----AANMDLFDEGTLVAKFDED-----GTVTWMPLVHGEGPLTAE--NG--FASQADVLIDTRLAADALGATKMDRPEWLAIDPVN--GTVYCTLTNNAKRGE--D--GQVPGGPNP:497  
Rta-3 NRI-----TTGDKYLDEGKLYVAKFAGD-----GTGEWIELSMANPAVAGYAAYA--FANQADVVVNARLAADAVGATRMDRPEWCAVHPVTG--EVYVYTLTNNANRKY--SPTGSQQPVDPANP:530  
Rta-4 -----GVLLAGRQLALRLRFASANTGIEFLDKLNQPMAVEWVDIPNP--P-----V--DNLVFNSTRAQQQAAGARFVVRGEGAWWG--NG--QIYFCCTSG--GN-----:348  
. . . \* . . . . . : : \* . . . . . \* . . . . . : : \* . . . . . \* . . . . . : : \* . . . . . \* . . . . .

[AVE\_SECSTR] cccccccscscscscscscscscscscCshHHHHHHHHHHTCCeeCEEEEEecttttccCEEEEECCbttttcscscscscscscscscscscCshHHHHHHHHHHTCCeeCEEEEEecttttccCEEEEECCbttttcscscscscscscscscscsc  
4alfA RE-----KNVYGQILRWRT--DRDDHASKTFADWLVVAGNPSVHAGTPKGG--SSNITPQNMFNPSDGLGFDKA--GRLWILTD--GDSS--NAGDFAGMGNQMLCADPATG-----:566(519)  
Rta-1 RA-----NNAHGHIIRWREGGEDG--GDFDAARFRWDLVLAGDPAQP--RAG--AKGNIRGDLFACPDGLAFDAR--GMLWIoTD--AHATQMYKGEFASIGNNQLACDVATG-----:565  
Rta-2 RA-----GNAMGHILRWQE--A--GDFDGLRFRWNHFLVLAGDPANP--RAE--ARGNVRGDAFACPDGLWADAR--GVLWIoTDMSAAVM--GRGEFARLGHNAAMLAADPRTG-----:552  
Sme RA-----KNAFGHIVEISE--TDGDFASTKSRWDVLLKCGDPSVAE--V--GASFSTATTRNGWFGMPNCAIDAE--GRLWVSTD--GNE--KDTG--RTDGWVAVETEGERG--:594  
Rta-3 RSYNDAATEAPASARNVNGHIIRLRE--DGGRGAATRFADWLYLFGAEADADP--A--RVN--LSGLNDDQDFSSPDGLWFSFKTGLCFIQT--DG-----AYTDETNCMLLIGRPGRVGDGQPVTLYNT:646  
Rta-4 -----ICAGQVWAYDP--ARD--LALVVESTD--R--GVEAPDNITLGED--GRLYMYED--GG-----NGNNIVGVNS--DG-----:409  
: . . \* . . . . . : : \* . . . . . \* . . . . . : : \* . . . . . \* . . . . . : : \* . . . . . \* . . . . .

[AVE\_SECSTR] cccccccscscscscscscscscscscCshHHHHHHHHHHTCCeeCEEEEEecttttccCEEEEECCbttttcscscscscscscscscscscCshHHHHHHHHHHTCCeeCEEEEEecttttccCEEEEECCbttttcscscscscscscscscscsc  
4alfA -----EIRRFVVGPI--GCEVVTGISFSDPKLFLVGIQHPGENG-----G-----S-----TFPEHLPNY-----KPRSSVMAITREDGGIVGA-----:633(586)  
Rta-1 -----EVRRLFTGPT--NSEVVTGMTMTDGRMFVNIQHPGETP-----S-----D--RSDPAEPAKFSNWPY-----RPGGRPRSSVTVIRKVDGGIVGT-----:643  
Rta-2 -----EVRRLFTGPT--NSEVVTGMTMTDGRMFVNIQHPGENP-----S-----ERGG-----TGRSTWPDH-----RPGGRPRSATVVIRRLDGLLIGT-----:626  
Sme -----TSKLFRRVPV--GAEVVTGMTMTDGRMFVNIQHPGETP-----T-----RWPDFRDM-----PVRPAVAVTRQGGGKIG-----:667  
Rta-3 RADGTTAEVTTTHVGAKPATATLARFLVGPV--DCEITGVTEPTDQKALFVNQHPGESI-----SKADVNDPA-----KYTSQWPSNAGYGLGK-----RPRSATLVITRDDGALIGNGPALNRNS:756  
Rta-4 -----ELFRVAENVNGSEFCGGCFSHNGRPFVNIQSPGLTL-----V-----IE--GPWRK-----Q--R-----:458  
. . . \* . . . . . : : \* . . . . . \* . . . . . : : \* . . . . . \* . . . . . : : \* . . . . . \* . . . . .

**Figure S1. Sequence conservation within PhoD and PhoX families.** (a) Pairwise sequence alignment of *B. subtilis* and *R. tataouinensis* PhoD family proteins. (b) Multiple sequence alignment of *P. fluorescens*, *S. meliloti* and *R. tataouinensis* PhoX family proteins. The average (or consensus) secondary structure is indicated above each position of the alignment (in black uppercase when completely conserved, grey lowercase otherwise): helices (G:  $3_{10}$  helix; H:  $\alpha$ -helix), strands (B: residue in isolated  $\beta$ -bridge; E: extended strand) or loops (S: bend; T: hydrogen bonded turn; C: random coil). The level of sequence conservation is represented below each position: 100% (asterisk), at least 75% (colon) or at least 50% (period) of identical amino acids. Sequences were ordered according to their pairwise similarity. The conserved active site residues are highlighted; their positions are those identified in the template 3D structures (*Bsu* PhoD: PDB chain 2yeqA; *Pfl* PhoX: PDB chain 4alfA). Sequence boundaries are given (corresponding PDB numbering between parentheses). The Ig-like domain and the catalytic domain of the PhoD proteins are separated by a space character in the alignment. The sequence of the PhoX protein of *Sinorhizobium meliloti* (Sme) corresponds to the Uniprot accession M4MZI0.
